# Supplementary material for: A novel cis-regulatory element drives early expression of Nkx3.2 in the gnathostome primary jaw joint
Source: eLife. 2022 Nov 15;11:e75749. doi: 10.7554/eLife.75749 (PMC9665848; doi:10.7554/eLife.75749)
Supplement: Figure 2—figure supplement 2—source data 1. — These data were obtained from the publicly available supplementary information of Amin et al., 2015 and Donaldson et al., 2012 . Genomic coordinates correspond to chromosome 5 in the mm9 mouse assembly. [file elife-75749-fig2-figsupp2-data1.xlsx]

## Sheet: Sheet2
	Tissue	Transcription factor	Start coordinate	End coordinate	Start of summit region	End of summit region	Summit position	Length (bp)	-10log10(Pvalue)	Fold enrichment	FDR (%)		Enrichment rank on Chr5		Percentile rank (%)
	Branchial Arch 1	Meis	42141203	42142581	42141686	42141886	42141787	1379	1118.46	95.67	0		6 /	3674	0.00163265
	Branchial Arch 2	Meis	42141001	42142624	42141571	42141771	42141672	1624	640.19	42.14	0.07		138 /	3574	0.0386122
	Branchial Arch 2	Hoxa2	42141541	42141996	42141649	42141849	42141749	456	137.22	27.34	0.92		68 /	421	0.16152
	Branchial Arch 2	Pbx	42140971	42142592	42141722	42141922	42141823	1622	555.61	30.36	0		165 /	3508	0.0470353
