# Supplementary material for: A novel cis-regulatory element drives early expression of Nkx3.2 in the gnathostome primary jaw joint
Source: eLife. 2022 Nov 15;11:e75749. doi: 10.7554/eLife.75749 (PMC9665848; doi:10.7554/eLife.75749)
Supplement: Figure 3—source data 1. [file elife-75749-fig3-data1.xlsx]

## Sheet: Figure3_Source_Data1
	Spotted Gar Query		Bichir Query
Target species	E-Value	Top hit	E-Value	Top hit
Pufferfish	0.83	CAAE01015033.1: 401,459-401,490	0.28	CAAE01015043.1: 97,898-97,932
Stickleback	0.37	CM029288.1: 8,238,805-8,238,755	3.4	CM029299.1: 3,619,591-3,619,617
Amazon Molly	0.2	KI519616.1: 1,796,299-1,796,358	0.0008	AYCK01023529.1: 16,886-16,846
Tilapia	0.083	CM007492.2: 22,122,096-22,122,138	2.4	MKQE02000007.1: 19,066,220-19,066,284
Seahorse	0.4	NW_017805583.1: 2,425,158-2,425,190	0.045	NW_017805625.1: 1922141-1922191
Mudskipper	0.2	CM020600.1: 28,837,478=28,837,521	0.08	WNMA01000004.1: 16,802,299-16,802,371
Toadfish	0.025	LR722978.1: 11,683,315-11,683,359	0.22	LR722974.1: 51,282,035-51,282,069
Cusk-eel	0.0002	VXCM01001316.1: 175,063-175,116	3e-05	VXCM01001316.1: 175,025-175,116
Alfonsino	3e-07	OMOV01016849.1: 12,092-12,166	9e-07	OMOV01016849.1: 12,104-12,166
Solderfish	2	LR597571.1: 29,138,016-29,138,057	0.003	LR597559.1: 10,777,407-10,777,452
Pineapplefish	5e-20	OOFE01011173.1: 36,402-36,532	2e-20	OOFE01011173.1: 36,395-36,532
Slimehead	6e-22	CABFOQ010011347.1: 2,730-2,860	2e-22	CABFOQ010011347.1: 2,730-2,867
Atlantic Cod	1e-15	LR633952.1: 23,155,799-23,155,943	1e-15	LR633952.1: 23,155,799-23,155,923
Atlantic Salmon	5e-34	HG993264.1: 21,047,640-21,047,800	2e-27	HG993264.1: 21,047,644-21,047,800
Zebrafish	5e-46	NC_007125.7: 210,022-210,222	7e-40	NC_007125.7: 210,022-210,217
Electric Eel	6e-56	CM023680.1: 9,320,019-9,320,245	1e-43	CM023680.1: 9,320,022-9,320,210
Arowana	1e-39	LR584076.1: 29,871,201-29,871,410	1e-32	LR584076.1: 29,871,201-29,871,407
Spotted Gar	6e-106	AHAT01001121.1: 6,202-6,446	3e-82	AHAT01001121.1: 6,205-6,443
Bichir	1e-81	CM029058.1: 153,453,007-153,453,244	2e-105	CM029058.1: 153,453,003-153,453,247
