# Supplementary material for: A novel cis-regulatory element drives early expression of Nkx3.2 in the gnathostome primary jaw joint
Source: eLife. 2022 Nov 15;11:e75749. doi: 10.7554/eLife.75749 (PMC9665848; doi:10.7554/eLife.75749)
Supplement: Figure 6—source data 1. [file elife-75749-fig6-data1.xlsx]

## Sheet: 48hpf
wt/het 48hpf	Relative pixel intensity (to the unstained tissue background)	mut 48hpf	Relative pixel intensity (to the unstained tissue background)
1.1-j1	84.409	1.4-j1	28.1707
1.1-j2	68.47	1.4-j2	16.1317
1.2-j1	84.449	3.1-j1	22.8115
1.2-j2	48.499	3.1-j2	17.3295
1.3-j1	39.445	3.3-j1	25.538
1.3-j2	20.823	3.3-j2	14.257
1.5-j1	65.4715	3.4-j1	54.295
1.5-j2	57.2915	3.4-j2	73.058
1.6-j1	52.921	3.6-j1	18.767
1.6-j2	47.425	3.6-j2	26.614
3.2-j1	53.83	3.7-j1	2.324
3.2-j2	39.874	3.7-j2	29.389
3.5-j1	27.6865	3.8-j1	41.006
3.5-j2	11.5415	3.8-j2	33.506
3.11-j1	39.871	3.9-j1	57.494
3.11-j2	33.806	3.9-j2	18.939
		3.10-j1	5.959
		3.10-j2	5.351
Normal distribution test: Kolmogorow-Smirnov
D value	0.1016		0.18369
P value	0.99053		0.51941
Unpairedd t-test
The two-tailed P value	0.0038
Mean	48.481		27.278
SEM	5.167		4.461
N	16		18

## Sheet: 56hpf
wt/het 56hpf	Relative pixel intensity (to the unstained tissue background)	mut 56hpf	Relative pixel intensity (to the unstained tissue background)
4.1-j1	69.131	4.6-j1	54.598
4.1-j2	69.094	4.6-j2	42.56
4.2-j1	94.595	4.7-j1	28.93
4.2-j2	72.97	4.7-j2	42.991
4.3-j1	68.648	4.9-j1	-1.676
4.3-j2	67.403	4.10-j1	53.073
4.4-j1	94.268	4.10-j2	49.302
4.4-j2	51.205	4.11-j1	1.056
4.5-j1	27.848	4.11-j2	-6.82
4.5-j2	19.941	4.14-j1	34.272
4.8-j1	81.698	4.14-j2	52.537
4.8-j2	58.626	4.15-j1	27.522
4.13-j1	93.729	4.15-j2	23.319
4.13-j2	81.622	4.16-j1	43.8315
4.17-j1	45.875	4.16-j2	50.1455
4.17-j2	49.308	4.18-j1	49.222
4.19-j1	39.68	4.18-j2	26.145
4.19-j2	55.636
Normal distribution test: Kolmogorow-Smirnov
D value	0 .12074		0.21506
P value	0.92758		0.35905
Unpairedd t-test
The two-tailed P value	0.0002
Mean	63.394		33.582
SEM	5.168		4.840
N	18		17
