# Supplementary material for: A novel cis-regulatory element drives early expression of Nkx3.2 in the gnathostome primary jaw joint
Source: eLife. 2022 Nov 15;11:e75749. doi: 10.7554/eLife.75749 (PMC9665848; doi:10.7554/eLife.75749)
Supplement: Figure 6—source data 2. [file elife-75749-fig6-data2.xlsx]

## Sheet: qPCR raw vallues
	rpl13a						nkx3.2
	Ct1	Ct2	Ct3	Average Ct	Control average:	DeltaCt rpl13a	Ct1	Ct2	Ct3	Average Ct	Control average:	DeltaCt nkx3.2		Ratio
WT4	24.358	24.361	24.355	24.358		-0.133	30.747	30.893	30.421	30.687		0.328444		1.32139
WT5	23.942	23.954	23.971	23.9557	24.225	0.269333	31.067	30.99	30.932	30.9963	31.0154	0.0191111		0.824247
WT6	24.354	24.374	24.356	24.3613		-0.136333	31.465	31.341	31.283	31.363		-0.347556		0.918142
Het2	24.464	24.447	24.436	24.449		-0.224	30.623	30.69	30.549	30.6207		0.394778		1.46737
Het3	23.788	23.886	23.843	23.839		0.386	30.665	30.586	30.526	30.5923		0.423111		0.939507
Het4	24.505	24.464	24.48	24.483		-0.258	30.516	30.446	30.566	30.5093		0.506111		1.59928
Mut1	24.668	24.674	24.641	24.661		-0.436	31.677	31.802	31.302	31.5937		-0.578222		1.01622
Mut2	24.159	24.063		24.111		0.114	31.304	31.301	31.191	31.2653		-0.249889		0.801141
Mut3	24.831	24.746		24.7885		-0.5635	31.881	31.806	31.585	31.7573		-0.741889		1.02401
		Converted:						Average % fold	STDEV	SE
Rpl efficiency:	1.13	2.13					WT	1.02126	0.264129	0.152495
nkx3.2 efficiency:	0.72	1.72					Het	1.33539	0.349128	0.201569
							Mut	0.947123	0.126485	0.0730261
